# Supplementary material for: Differential Impact of Nitric Oxide and Abscisic Acid on the Cellular and Physiological Functioning of sub1A QTL Bearing Rice Genotype under Salt Stress
Source: MDPI journal article supplement (doi:10.3390/plants11081084), 2022-04-15
Supplement: s1 [file s1]

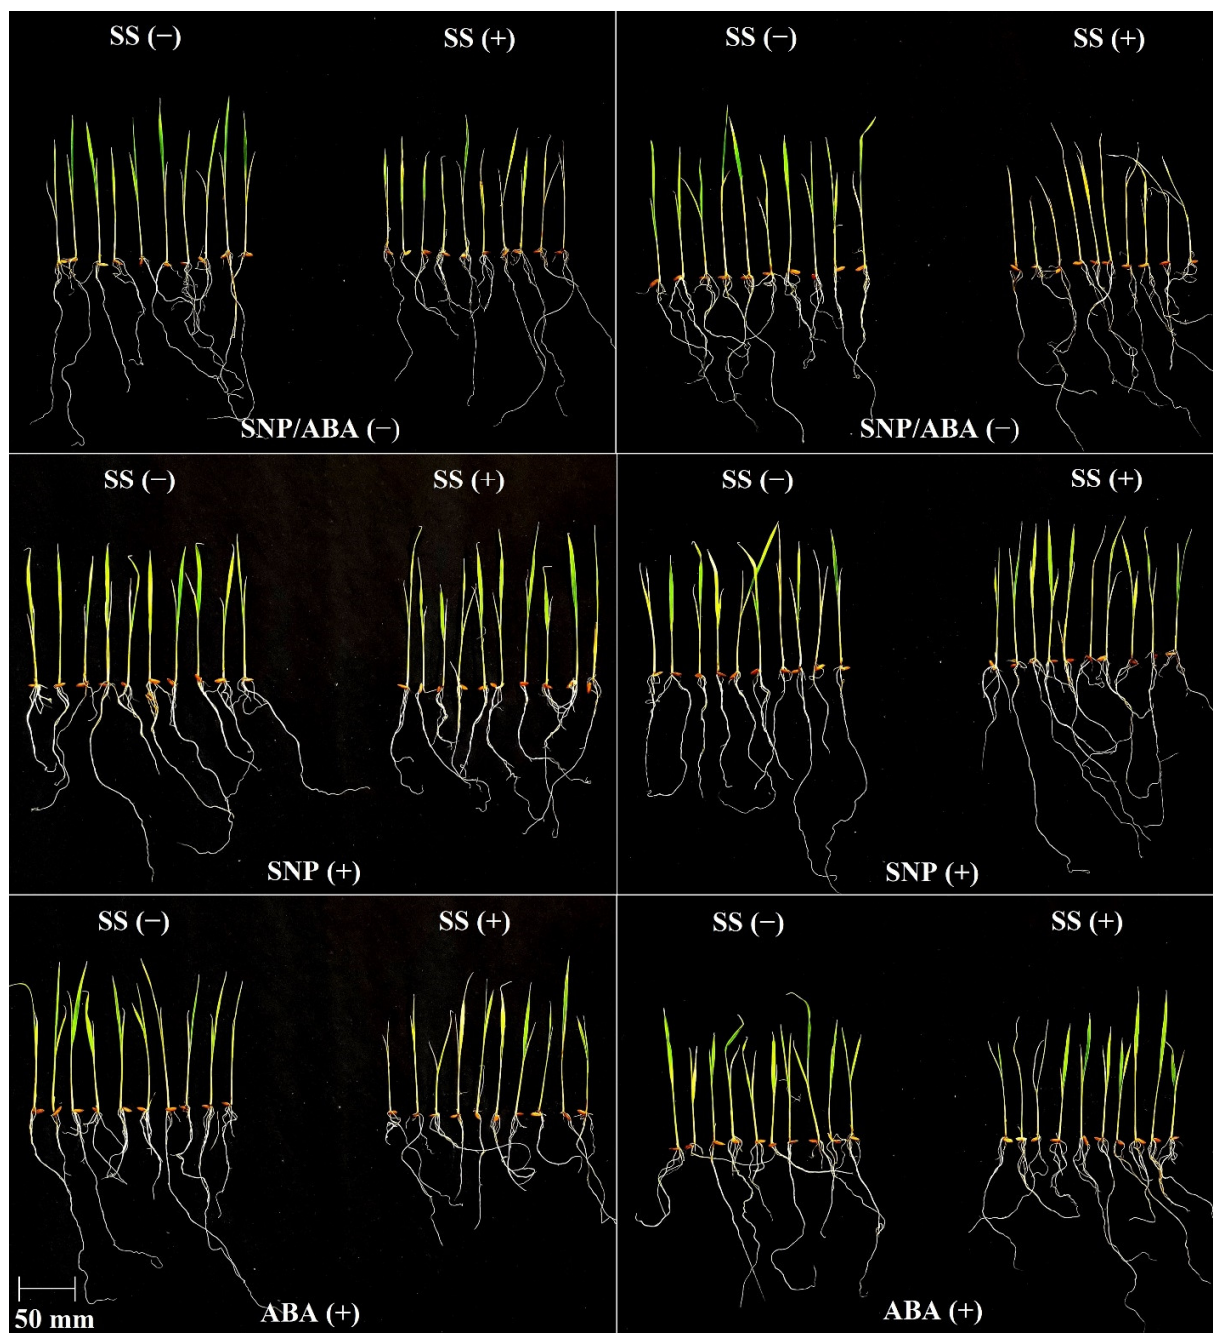

## cv. Swarna

## cv. Swarna Sub1

**Figure S1.** Growth of seedling in two rice genotypes Rice (cv Swarna and cv. Swarna Sub1) under salinity stress [SS (+)] and non-salinity stress [SS (-)] for 72h with [SNP (+) or ABA(+)] or without [SNP/ABA(-)] priming for 24h.
